# Supplementary material for: Liquid biopsy approaches to capture tumor evolution and clinical outcomes during cancer immunotherapy
Source: PubMed Central journal article supplement — J Immunother Cancer. 2023 Jan 19;11(1):e005924. doi: 10.1136/jitc-2022-005924 (PMC9853269; doi:10.1136/jitc-2022-005924), 2023-01-19
Supplement: jitc-2022-005924supp001.pdf [file jitc-2022-005924supp001.pdf]

**Supplemental Tables for**  
**Liquid biopsy approaches to capture tumor evolution and clinical outcomes**  
**during cancer immunotherapy**

**Lavanya Sivapalan<sup>1</sup>, Joseph Murray<sup>1</sup>, Jenna Canzoniero<sup>1</sup>, Blair Landon<sup>1</sup>, Jennifer Jackson<sup>2</sup>, Susan Scott<sup>1</sup>,  
Vincent Lam<sup>1</sup>, Benjamin Levy<sup>1</sup>, Mark Sausen<sup>2</sup> and Valsamo Anagnostou<sup>1,3</sup>**

<sup>1</sup>The Sidney Kimmel Comprehensive Cancer Center, Johns Hopkins University School of Medicine,  
Baltimore, MD 21287, USA

<sup>2</sup>Personal Genome Diagnostics, Baltimore, MD 21224, USA

<sup>3</sup>The Bloomberg-Kimmel Institute for Cancer Immunotherapy, Johns Hopkins University School of  
Medicine, Baltimore, MD 21287, USA

**\*To whom correspondence should be addressed:**

Valsamo Anagnostou, MD, PhD

Sidney Kimmel Comprehensive Cancer Center

Cancer Research Building 2, Rm 546

1550 Orleans Street, Baltimore, MD, 21287

Tel: 410-614-8948

Email: vanagno1@jhmi.edu

| Study                        | Cohort size | Tumor type      | Disease stage | ctDNA analysis method | Additional blood-derived analytes                                                               | Treatment(s)                                                                                    |
|------------------------------|-------------|-----------------|---------------|-----------------------|-------------------------------------------------------------------------------------------------|-------------------------------------------------------------------------------------------------|
| Anagnostou et al., 2019 [23] | n=24        | NSCLC           | Metastatic    | Targeted NGS          | Peripheral TCR clonal dynamics                                                                  | Nivolumab, nivolumab-ipilimumab, nivolumab-anti-Lag3, pembrolizumab, pembrolizumab-chemotherapy |
| Nabet et al., 2020 [73]      | n=99        | NSCLC           | Advanced      | Targeted NGS          | Peripheral CD8+ T cell counts                                                                   | Anti-PD-(L)1                                                                                    |
| Hwang et al., 2022 [109]     | n=24        | NSCLC           | Early-stage   | Targeted NGS          | NLR dynamics                                                                                    | Nivolumab, nivolumab-ipilimumab                                                                 |
| Goodman et al., 2022 [117]   | n=12        | B-cell lymphoma | Relapsed      | sWGS                  | Abundance of CAR T-cell construct                                                               | CD19 CAR T-cell therapy                                                                         |
| Cherng et al., 2022 [118]    | n=122       | B-cell lymphoma | Relapsed      | sWGS                  | Markers of increased tumor bulk (elevated lactate dehydrogenase and number of extranodal sites) | CD19 CAR T-cell therapy                                                                         |

**Supplemental Table S1. Summary of studies evaluating ctDNA alongside other blood-based features to monitor response to cancer immunotherapy.**

Abbreviations: bTMB, blood tumor mutation burden; C (1), Cycle (1) therapy; CAR T-cell therapy, chimeric antigen receptor T-cell therapy; CTC, circulating tumor cell; DCB, durable clinical benefit; NLR, neutrophil-to-lymphocyte ratio; PFS, progression-free survival; sWGS, shallow whole genome sequencing; TCR, T cell receptor
